# Supplementary material for: IL-17F induces inflammation, dysfunction and cell death in mouse islets
Source: PubMed Central journal article supplement (PMC7403586; doi:10.1038/s41598-020-69805-2), 2020-08-04
Supplement: 41598_2020_69805_MOESM1_ESM.pdf [file 41598_2020_69805_MOESM1_ESM.pdf]

# **IL-17F induces inflammation, dysfunction and cell death in mouse islets**

## **(IL-17F in mouse islets)**

Tara Catterall<sup>1</sup>, Stacey Fynch<sup>1</sup>, Thomas W. H. Kay<sup>1,2</sup>, Helen E. Thomas<sup>1,2</sup>, Andrew P. R. Sutherland<sup>1,2</sup>

<sup>1</sup>St Vincent's Institute of Medical Research, Melbourne, Australia

<sup>2</sup>The University of Melbourne, Department of Medicine, St. Vincent's Hospital, Fitzroy, Victoria, Australia

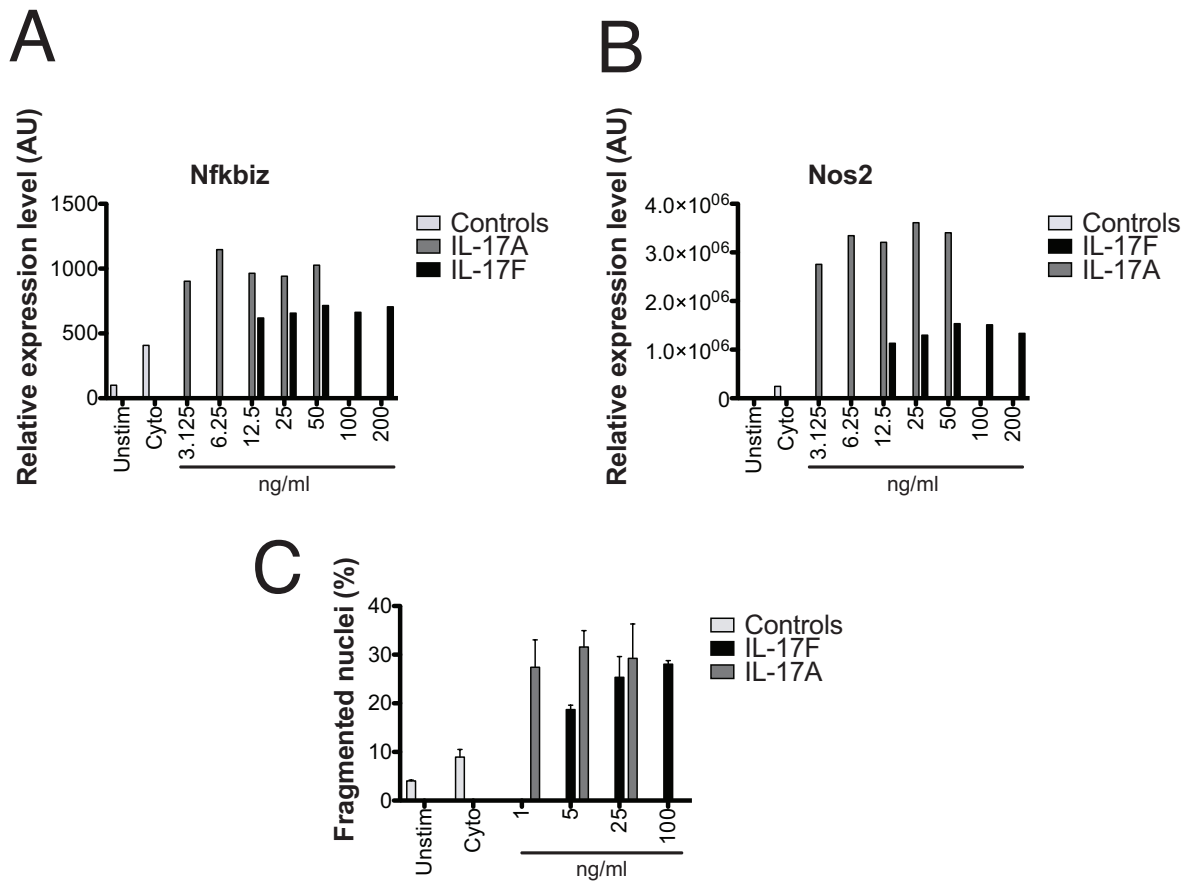

**Supplementary Figure 1: Titration of IL-17F and IL-17A induced effects in MIN6 cells and primary islets.**

A) MIN6 cells were stimulated with IL-17F or IL-17A at various concentrations for 4 hrs and *Nfkbiz* expression measured by Taqman quantitative RT-PCR. B) MIN6 cells were stimulated with IL-17F or IL-17A at various concentrations for 24 hrs in combination with TNF $\alpha$ +IFN $\gamma$  and *Nos2* expression measured by Taqman quantitative RT-PCR. C) NOD islets were stimulated with IL-17F or IL-17A at various concentrations in combination with TNF $\alpha$ +IFN $\gamma$  and cell death quantified by DNA fragmentation.

| Gene    | gRNA # |            | Primer A                        | Primer B                        |
|---------|--------|------------|---------------------------------|---------------------------------|
| IL-17RA | 1      | 5' of exon | 5'-CACCGAGCATTAGAAAAGAGCAGGC-3' | 5'-AAACGCCTGCTCTTTTCTAATGCTC-3' |
|         | 2      | 3' of exon | 5'-CACCGCTTAGGAACACAGTGCAGTG-3' | 5'-AAACCACTGCACTGTGTTCTAAGC-3'  |
| IL-17RC | 1      | 5' of exon | 5'-CACCGAAGCTCCCTGCCCTCTGC-3'   | 5'-AAACGCAGAGGGCAGGGGAGCTTCC-3' |
|         | 2      | 3' of exon | 5'-CACCGAGGTGGCTTCTCCTCAGG-3'   | 5'-AAACCTGAGGAGAAGAGCCACCTC-3'  |
|         |        |            |                                 |                                 |
|         |        |            |                                 |                                 |
|         |        |            |                                 |                                 |

Supplementary Table 1: List of primers for CRISPR/Cas9 gene editing

| Gene   | Taqman Probe set # |
|--------|--------------------|
| Actb   | Mm02619580_g1      |
| Cxcl1  | Mm04207460_m1      |
| Cxcl2  | Mm00436450_m1      |
| Ccl20  | Mm04207460_m1      |
| Foxo1  | Mm00490671_m1      |
| Glut2  | Mm00446229_m1      |
| Il17ra | Mm00434214_m1      |
| Il17rb | Mm00444709_m1      |
| Il17rc | Mm00506606_m1      |
| Il17rd | Mm00460340_m1      |
| Il17re | Mm01189488_m1      |
| Ins1   | Mm01950294_s1      |
| Ins2   | Mm00731595_gH      |
| Nfkbiz | Mm00600522_m1      |
| Nos2   | Mm00440502_m1      |
| Pdx1   | Mm00435565_m1      |

Supplementary Table 2: List of primers for Taqman quantitative RT-PCR
